# Supplementary material
Source: Springer Nature journal article supplement (https://www.springermedizin.de/resource/supplementary/13041_2009_30_MOESM5_ESM.pdf/25657446)

## Elevated plus maze

**A**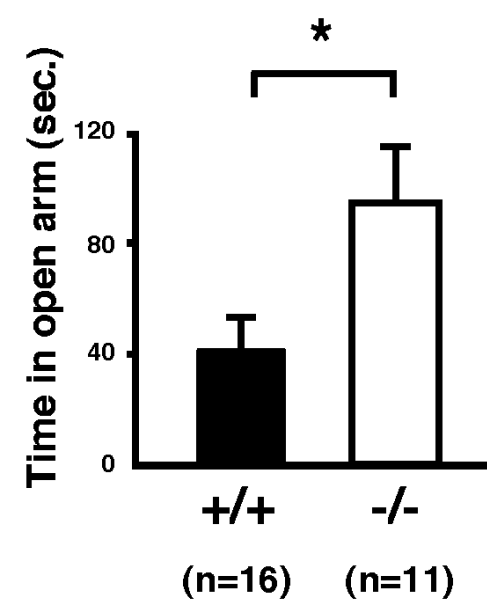**B**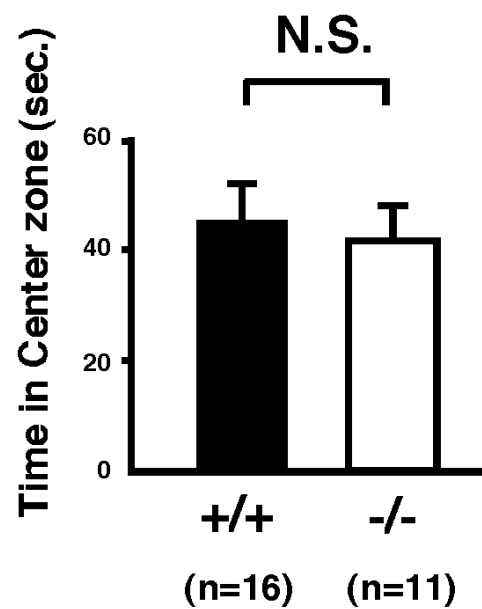**C**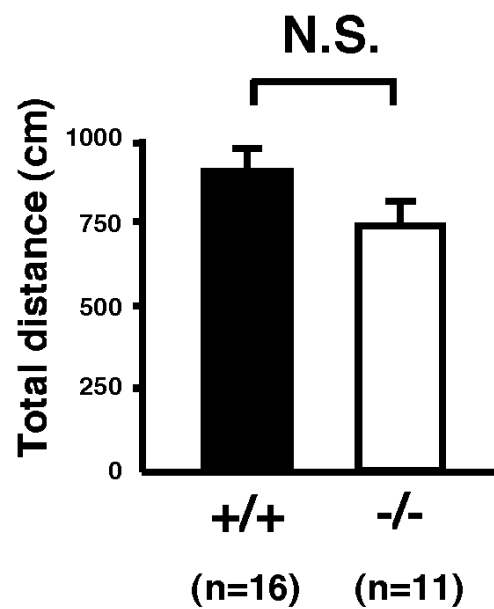

## Open field test

**D**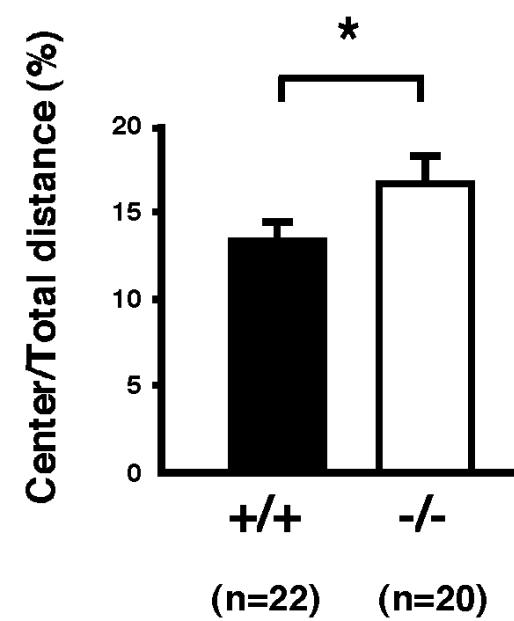**E**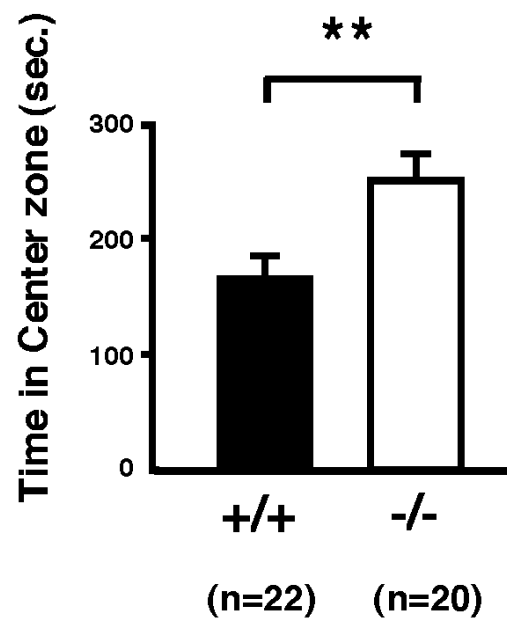**F**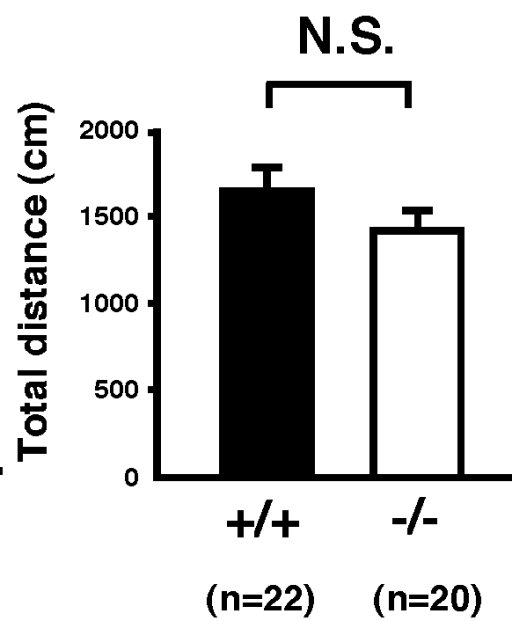

Supplement: MOESM5 [file 25657446]
